# Supplementary material for: An Immune Cell Signature Is Associated With Disease-Free Survival and Adjuvant Chemosensitivity of Patients With Resectable Gastric Cancer
Source: PubMed Central journal article supplement (PMC7890018; doi:10.3389/fimmu.2020.621623), 2021-02-04
Supplement: DataSheet_1.pdf [file DataSheet_1.pdf]

# Figure S1

a.

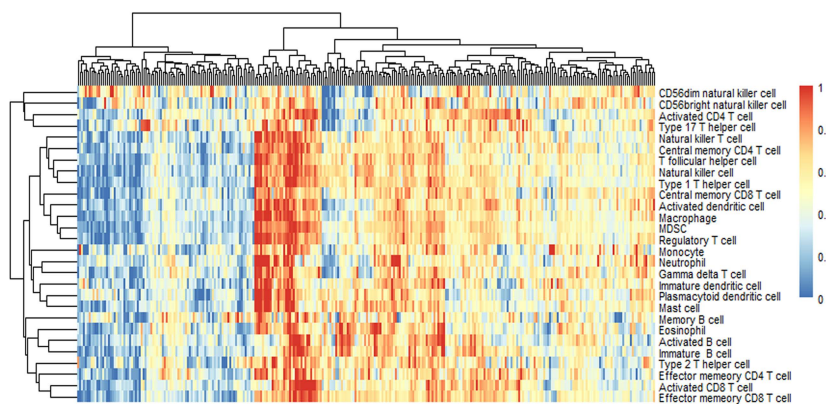

b.

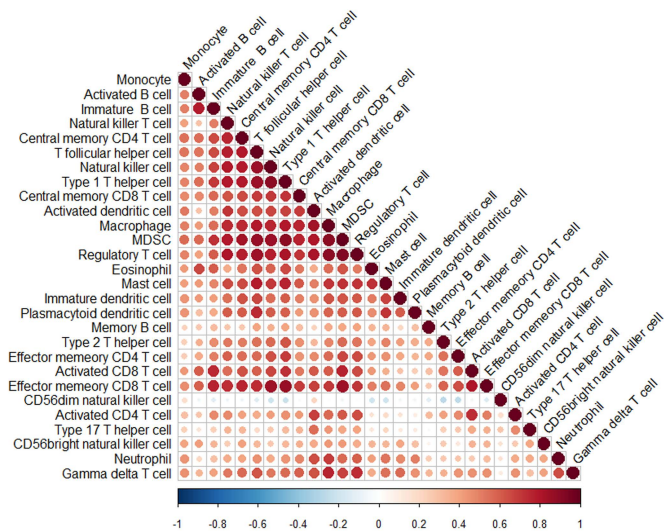

# Figure S2

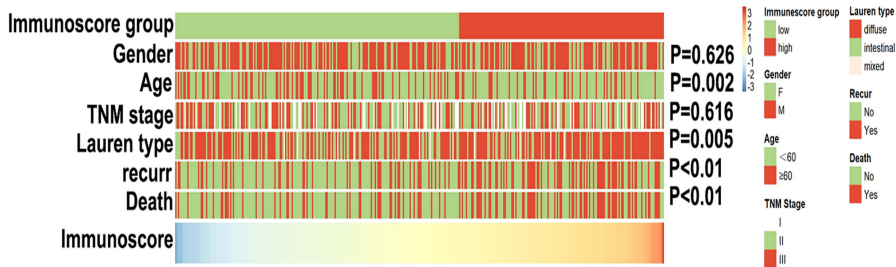

# Figure S3

a.

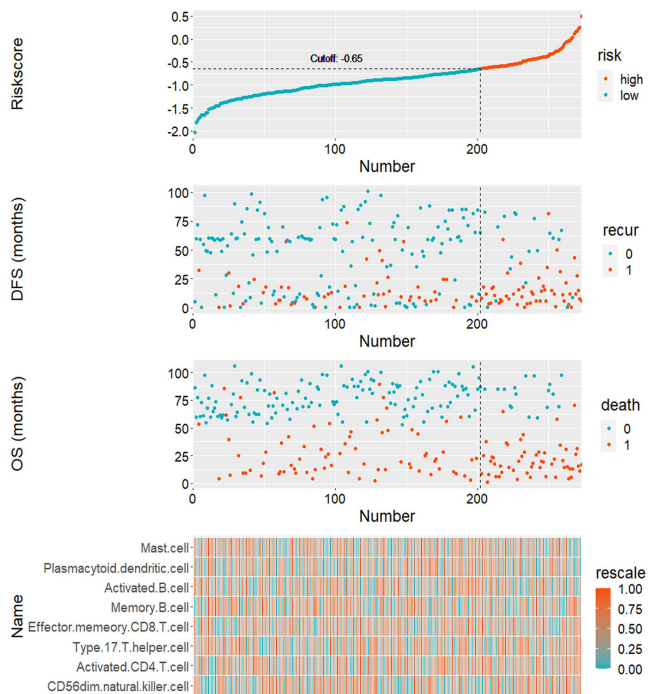

b.

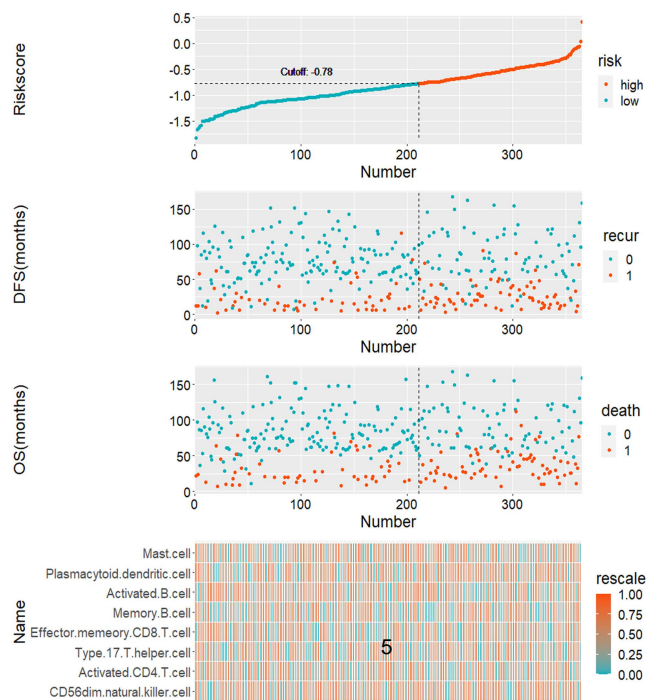

# Figure S4

a.

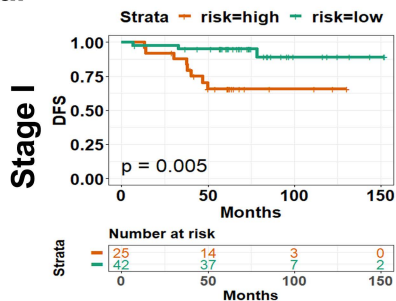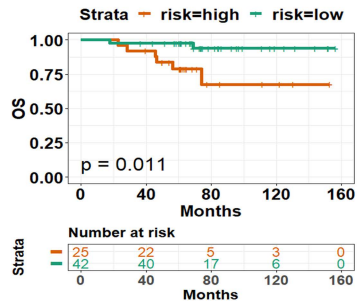

b.

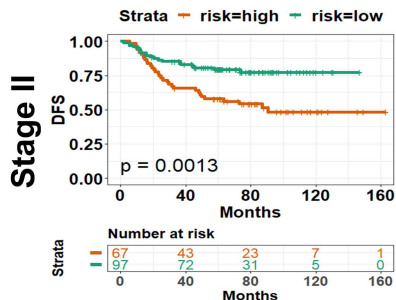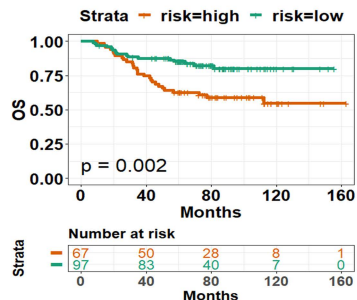

c.

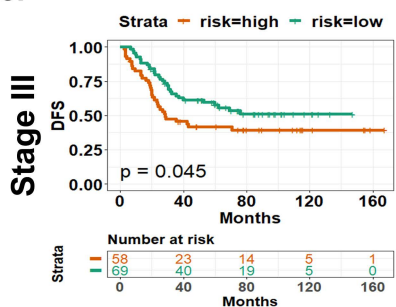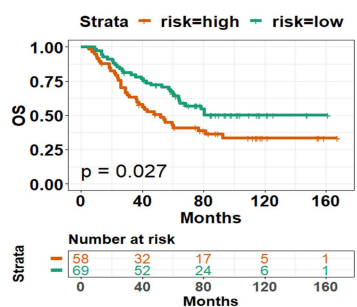

# Figure S5

a. Training cohort:DFS

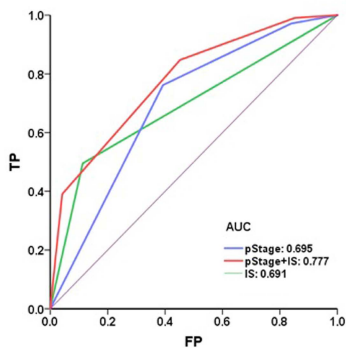

Testing cohort:DFS

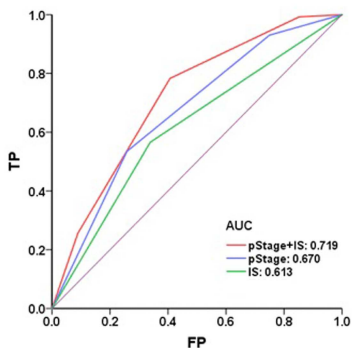

b. Training cohort:OS

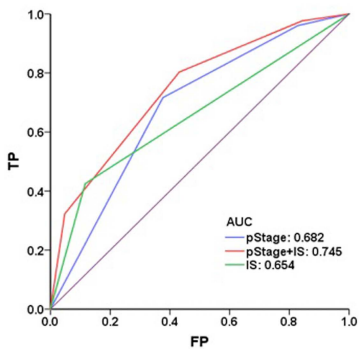

Testing cohort:OS

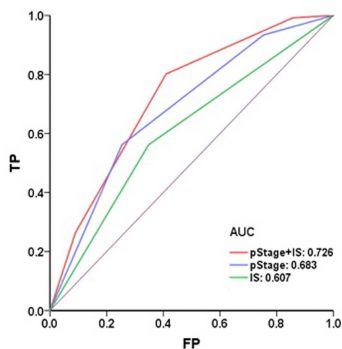

# Figure S6

a.

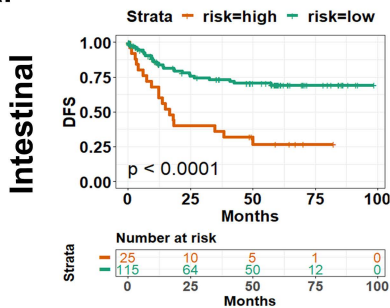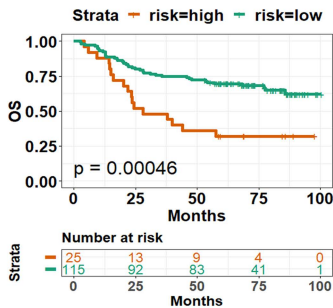

b.

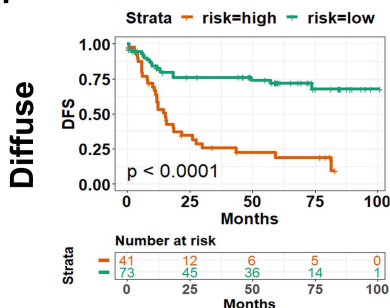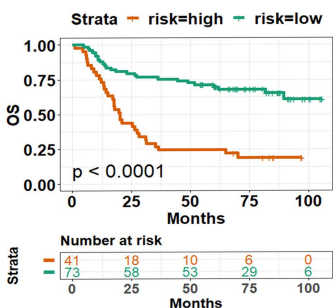

c.

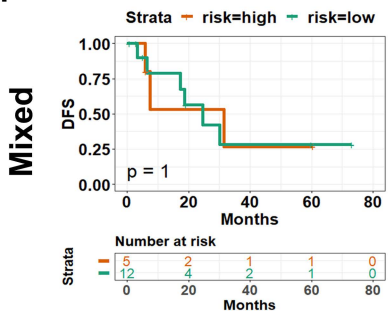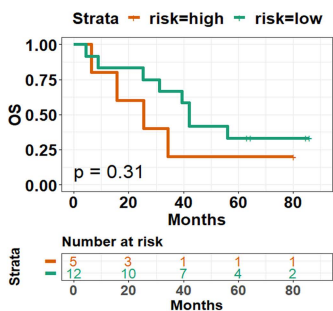

d.

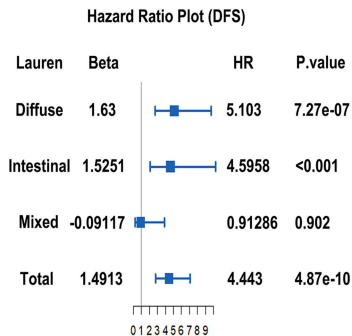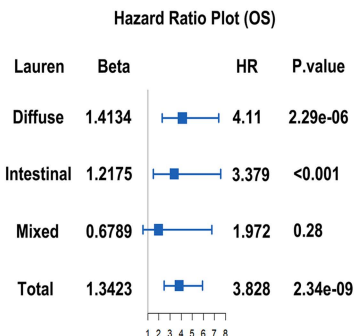

# Figure S7

a.

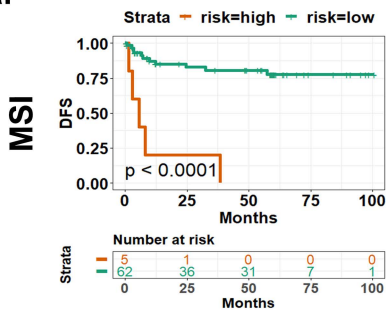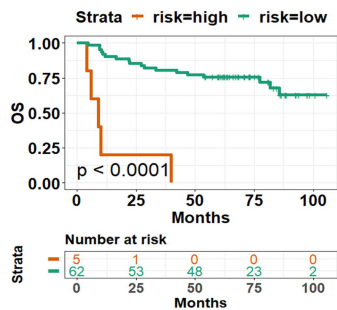

b.

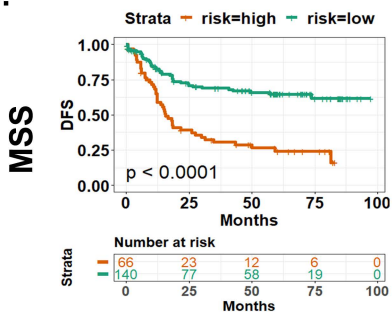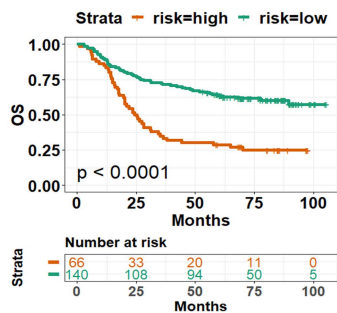

c.

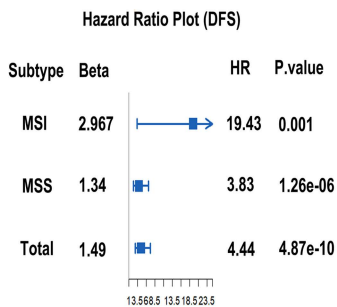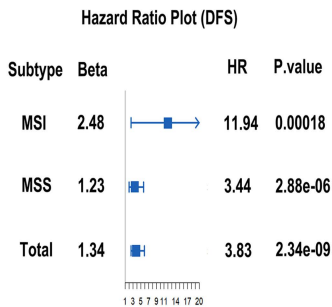

# Figure S8

## Hazard Ratio Plot (DFS)

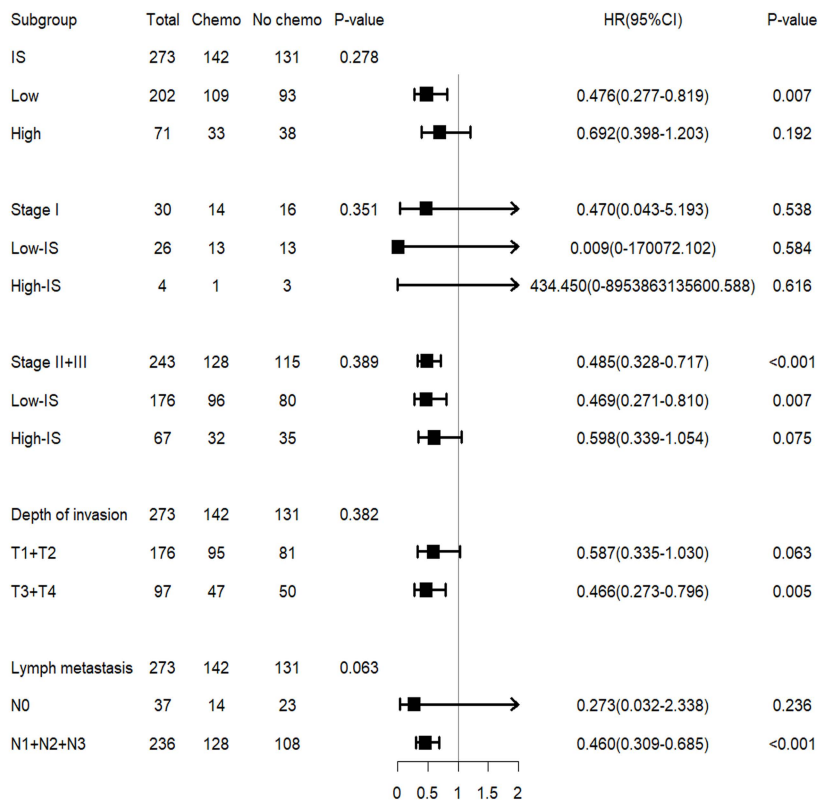



# Figure S9

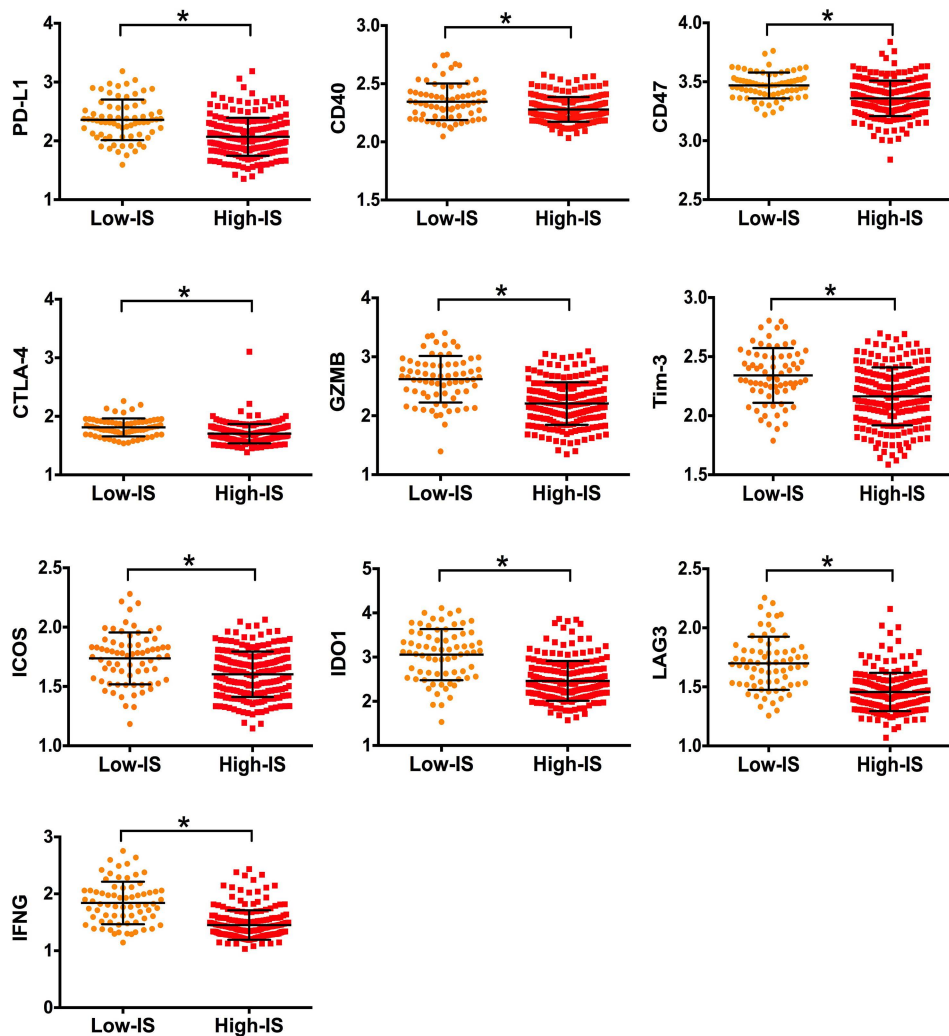

**Table S1 Univariable and multivariable association of IS classifier, clinicopathological characteristics with overall survival in the training cohort.**

|                                          | Univariate analysis |         | Multivariate analysis |         |
|------------------------------------------|---------------------|---------|-----------------------|---------|
|                                          | HR(95% CI)          | P value | HR(95% CI)            | P value |
| Gender                                   | 0.992(0.822-1.198)  | 0.937   |                       |         |
| Age                                      | 1.014(0.997-1.031)  | 0.113   |                       |         |
| T stage(T2+T3 vs. T1+T2)                 | 2.347(1.655-3.327)  | <0.01   |                       |         |
| N stage(N1+N2+N3 vs. N0)                 | 2.706(1.321-5.543)  | 0.006   |                       |         |
| TNM stage(III vs. I+II)                  | 2.979(2.023-4.387)  | <0.01   |                       |         |
| Lauren type                              | 1.432(1.008-1.885)  | 0.01    |                       |         |
| Status of microsatellite<br>(MSI vs.MSS) | 1.283(1.023-1.608)  | 0.031   |                       |         |
| Liver metastasis                         | 4.195(2.742-6.418)  | <0.01   | 2.378(1.455-3.886)    | 0.001   |
| Peritoneal metastasis                    | 4.974(3.375-7.331)  | <0.01   | 2.251(1.449-3.499)    | <0.01   |
| Bone metastasis                          | 4.664(3.163-6.876)  | <0.01   | 2.585(1.644-4.064)    | <0.01   |
| Intraabdominal_LN                        | 2.661(0.843-8.399)  | 0.095   |                       |         |
| IS                                       | 1.694(1.425-2.014)  | <0.01   | 1.296(1.042-1.614)    | 0.02    |

Abbreviation: *MSS* microsatellite stability; *MSI* microsatellite instability; *HR* hazard ratio; *LN* lymph node; *IS* immunoscore.

**Table S2 Univariable and multivariable association of IS classifier, clinicopathological characteristics with disease-free survival in the testing cohort.**

|                    | Univariate analysis |         | Multivariate analysis |         |
|--------------------|---------------------|---------|-----------------------|---------|
|                    | HR(95% CI)          | P value | HR(95% CI)            | P value |
| Gender             | 0.792(0.545-1.150)  | 0.221   |                       |         |
| Age                | 0.998(0.982-1.014)  | 0.82    |                       |         |
| TNM (III vs. I+II) | 2.574(1.820-3.641)  | <0.01   | 2.599(1.838-3.676)    | <0.01   |
| Lauren type        | 0.975(0.703-1.352)  | 0.879   |                       |         |
| IS                 | 1.926(1.181-3.142)  | 0.009   | 1.899(1.200-3.005)    | 0.006   |

Abbreviation: *HR* hazard ratio; *IS* immunoscore.

**Table S3 Univariable and multivariable association of IS classifier, clinicopathological characteristics with overall survival in the testing cohort.**

|                    | Univariate analysis |         | Multivariate analysis |         |
|--------------------|---------------------|---------|-----------------------|---------|
|                    | HR(95% CI)          | P value | HR(95% CI)            | P value |
| Gender             | 0.800(0.543-1.177)  | 0.258   |                       |         |
| Age                | 1.000(0.983-1.017)  | 0.991   |                       |         |
| TNM (III vs. I+II) | 2.842(1.983-4.072)  | <0.01   | 2.863(1.997-4.102)    | <0.01   |
| Lauren type        | 1.084(0.773-1.520)  | 0.64    |                       |         |
| IS                 | 2.026(1.224-3.353)  | 0.006   | 1.997(1.234-3.167)    | 0.005   |

Abbreviation: *HR* hazard ratio; *IS* immunoscore.
